# Supplementary material for: Real-Time Control of a Multi-Degree-of-Freedom Mirror Myoelectric Interface During Functional Task Training
Source: Frontiers journal article supplement (doi:10.3389/fnins.2022.764936), 2022-03-11
Supplement: Data_Sheet_1.pdf [file Data_Sheet_1.pdf]

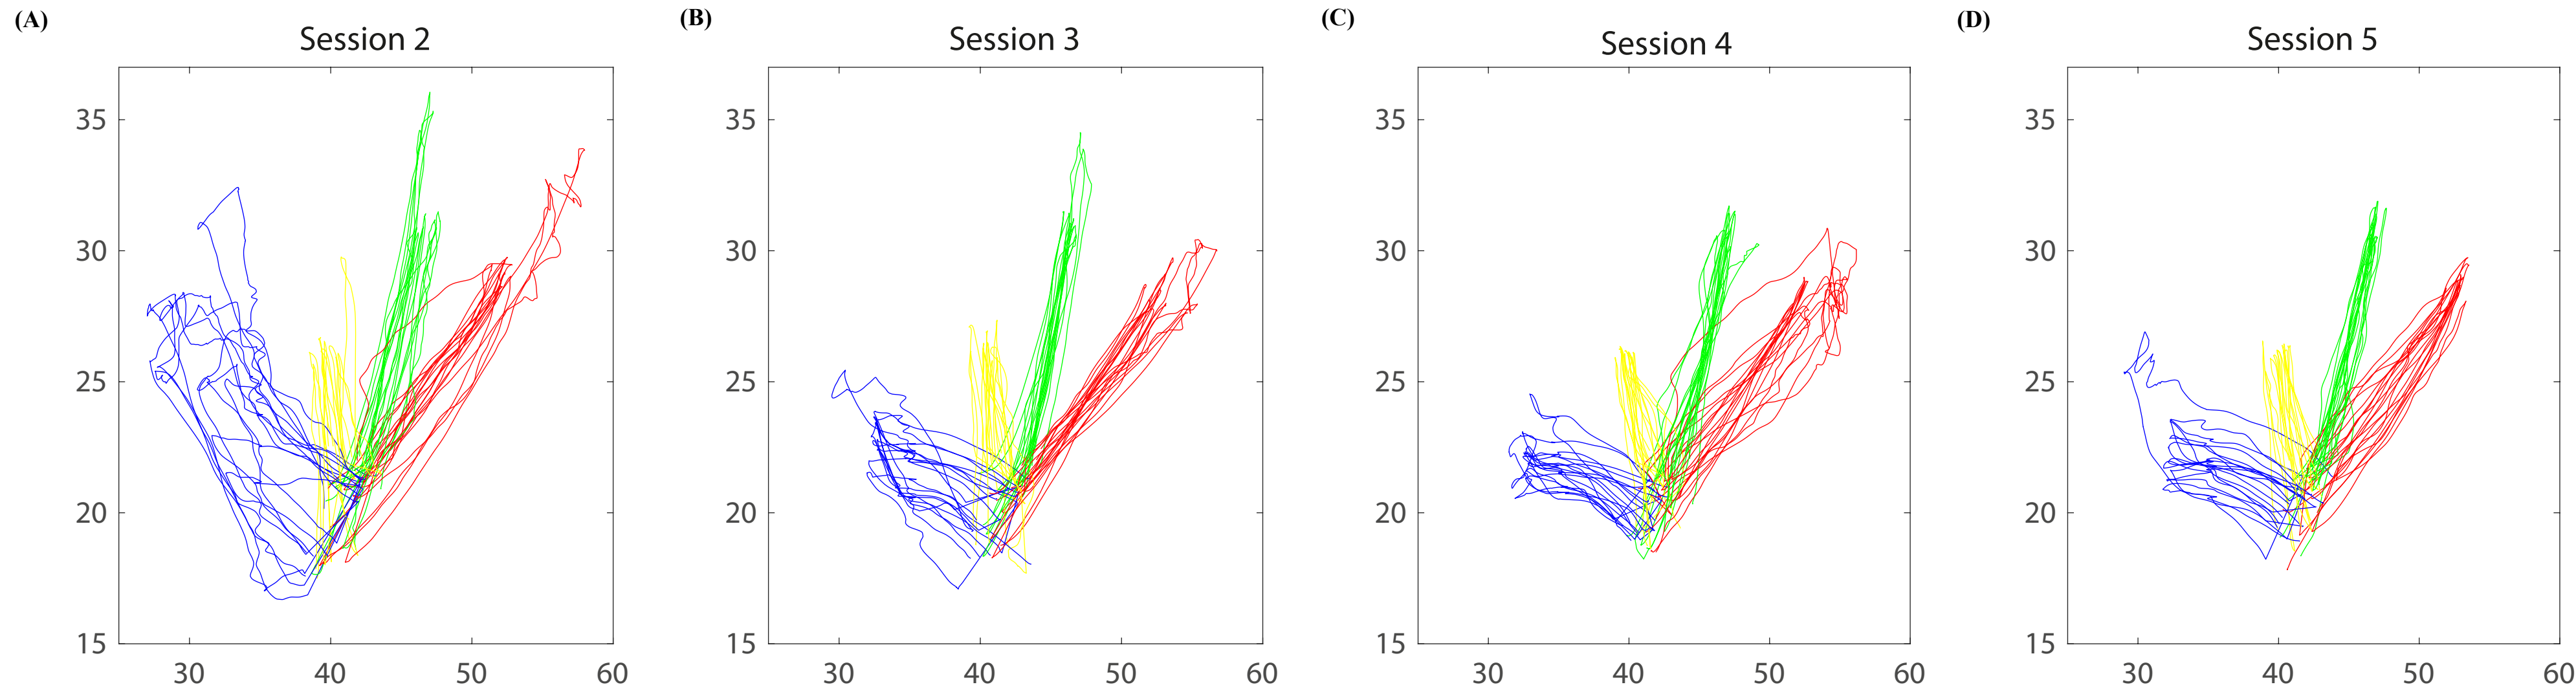

Supplementary Figure 1: Paths followed by one of the participants towards the four target locations (blue, yellow, green and red targets) during the training blocks of sessions 2-5.
